# Supplementary material for: Synthesis, X-ray characterization and regium bonding interactions of a trichlorido(1-hexylcytosine)gold(iii) complex
Source: Royal Society of Chemistry journal article supplement (doi:10.1039/d0cc00505c), 2020-01-01
Supplement: d0cc00505c1.pdf [file d0cc00505c1.pdf]

Supplementary material for manuscript:

## Synthesis, X-ray characterization and regium bonding interactions of a trichloro(1-hexylcytosine)-gold(III) complex

Angel Terrón,<sup>a,\*</sup> Jordi Buils,<sup>a</sup> Tidlo J. Mooibroek,<sup>b,\*</sup> Miquel Barceló-Oliver,<sup>a</sup> Angel García-Raso, Juan J. Fiol and Antonio Frontera<sup>a,\*</sup>

### Table of contents:

|                                                                         |        |
|-------------------------------------------------------------------------|--------|
| Overview of known purine and pyrimidine(-like) Au(III) X-ray structures | Pag 2  |
| Materials and methods                                                   | Pag 3  |
| Single Crystal X-ray Diffraction (SC-XRD)                               | Pag 4  |
| Theoretical methods                                                     | Pag 6  |
| Details of the Cambridge Structure Database analysis                    | Pag 7  |
| References                                                              | Pag 13 |

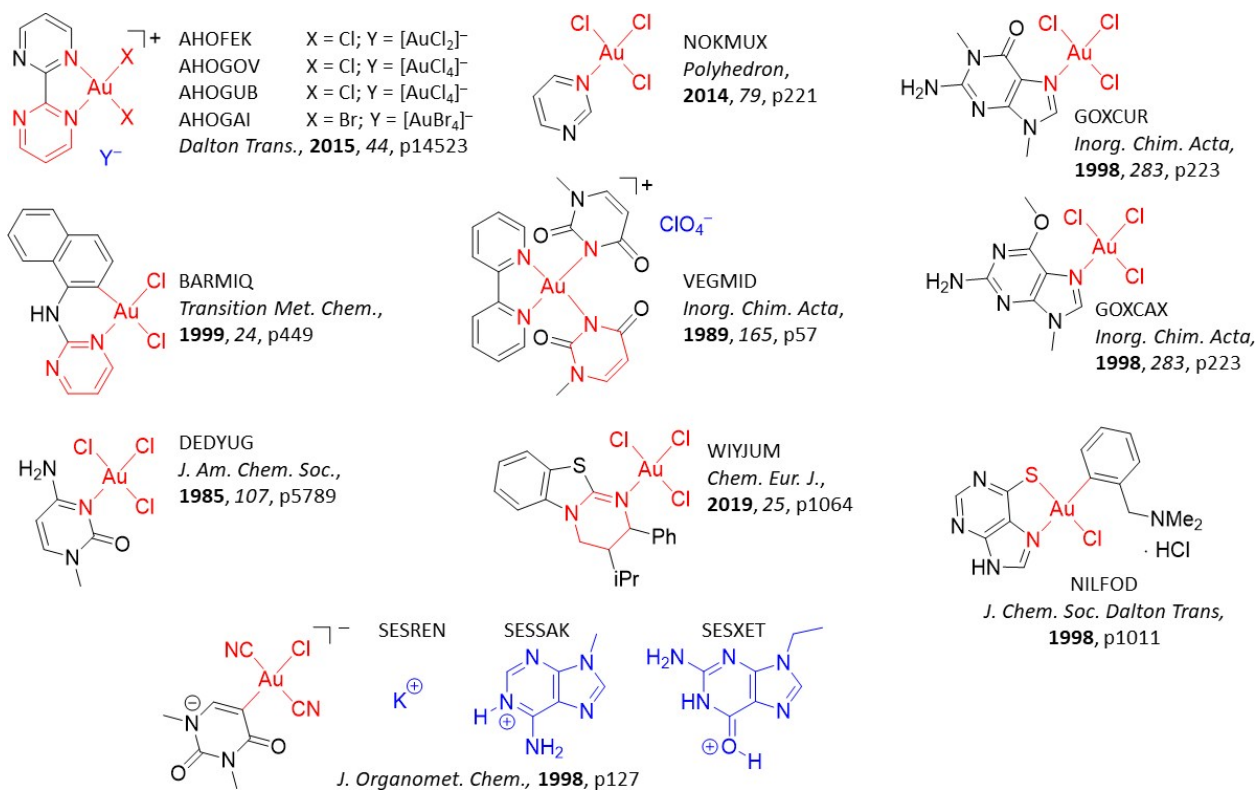

**Figure S1.** Overview of all twelve purine or pyrimidine(-like) X-ray structures currently present within the Cambridge Structure Database.

## Materials and methods

All chemicals were obtained from commercial sources (Sigma-Aldrich) and used without further purification. N<sup>1</sup>-hexylcytosine was obtained as previously published.<sup>1</sup>

Elemental analysis of C, H and N was carried out using a Carlo-Erba (1106 and 1108) and Microanalyzer Thermo Finnigan Flash 1112 apparatus.

The FT-IR spectra in the solid state (KBr pellets) were recorded in the 4000-400 cm<sup>-1</sup> range on a Bruker Tensor 27 spectrometer. The <sup>1</sup>H NMR spectra were recorded at room temperature on a Bruker AMX 300 (300 MHz). Proton chemical shifts in DMSO-d<sub>6</sub> were referenced itself to the residual peak from the solvent DMSO-d<sub>6</sub> [<sup>1</sup>H NMR d = 2.50 ppm].

For the ESI-HRMS, an Orbitrap mass spectrometer (ThermoFisher Scientific) operating with a heated electrospray interface (HESI) was employed and the spectra was recorded in negative mode. The temperature of ion transfer capillary was set to 320 °C, the spray voltage was set to 2.9 kV in negative mode and S-lens RF level 50 AU. Direct injection in Full scan acquisition mode over a range of 190-1000 m/z was performed with a resolution of 140000.

### Synthesis of [AuCl<sub>3</sub>(N<sup>1</sup>-hexylcytosine,*N*(3))], chemical formula C<sub>10</sub>H<sub>17</sub>AuCl<sub>3</sub>N<sub>3</sub>O

To a solution of 0.5 mmol Na[AuCl<sub>4</sub>]·2H<sub>2</sub>O in 20 ml of water quality Milli-Q, 0.5 mmol of N<sup>1</sup>-hexylcytosine were added as a dispersion. The mixture in the absence of light was stirred for 4 days. A yellow precipitated appeared, the solid was filtered off and recrystallized in a mixture of acetonitrile (10ml) and water (0.1ml). After two days, yellow needles appeared mixed with white crystals of the ligand. The selected crystals were adequate for a monocrystal X-ray study.

The molecular unity was identified by ESI-HRMS with a good and coherent isotopical distribution. To obtain the compound with better yield and without impurities of the ligand, a different synthetic procedure was designed.

Two solutions, one containing of 0.5 mmol of Na[AuCl<sub>4</sub>]·2H<sub>2</sub>O solved in 2 ml of water Milli-Q and other of 0.5 mmol of N<sup>1</sup>-hexylcytosine in 20 ml of dioxane, were mixed. The mixture was stirred for 24 hours in the absence of light. A final yellow solution is obtained. The solution was rota-evaporated to a few millilitres and dried in a desiccator. The yellow solid obtained was powdered down and cleaned with chloroform stirring for 24 hours. The yellow solid was filtered off and dried, the yield was 49%.

Elemental analysis of [AuCl<sub>3</sub>(C<sub>10</sub>H<sub>17</sub>N<sub>3</sub>O)]<sub>2</sub>·3(CHCl<sub>3</sub>): Experimental: C, 20.15 %, H, 2.75 % and N, 6.58 %; Calculated for C<sub>23</sub>H<sub>37</sub>Au<sub>2</sub>Cl<sub>15</sub>N<sub>6</sub>O<sub>2</sub>: C, 20.38 %, H, 2.75 % and N, 6.20 %.

ESI-HRMS: Exact mass (m/z), 496.0032 (M-H); Calculated for C<sub>10</sub>H<sub>16</sub>ON<sub>3</sub><sup>197</sup>Au<sup>35</sup>Cl<sub>3</sub>, 496.0030.

IR(cm<sup>-1</sup>): 3419.91 vs; 3328.60 vs; 3222.82 s; 3114.86w; 3073.83 w; 2956.23 m; 2924.91 m; 2854.20 m; 1721.86 w; 1671.57 vs; 1640.29 vs; 1620.84 vs; 1530.08 m; 1510.79 vs; 1462.04 m; 1398.33 s; 1381.30 s.

<sup>1</sup>H-NMR: The complex dissolves with decomposition in DMSO giving free ligand and a set of resonances that are consistent with coordinated ligand (presumably complex 1). These signals were: δ (ppm) 9.40 (s(br), 1H, H(4a)), 9.12 (s(br), 1H, H(4b)), 7.90 (d, 1H, H(6), *J* = 7.50Hz), 6.00 (d, 1H, H(5), *J* = 6.30Hz), 3.78 (t, 2H, H(7), *J* = 7.20 Hz), 1.54 (m(br), 2H, H(8)), 1.25 (s(br), 6H, H(9,10,11)), 0.85 (t, 3H, H(12), *J* = 6.30 Hz).

The neutral complex is not soluble in water and chloroform, but soluble in other organic solvents like acetonitrile or 1,4-dioxane.

### Single Crystal X-ray Diffraction (SC-XRD)

Suitable crystals of  $[\text{AuCl}_3(\text{N}^1\text{-hexylcytosine}, \text{N}(3))]$  were selected for X-ray single crystal diffraction experiments, covered with oil (Infineum V8512, formerly known as Paratone N) and mounted at the tip of a nylon CryoLoop on a BRUKER-NONIUS X8 APEX-II KAPPA CCD diffractometer using graphite monochromated  $\text{MoK}\alpha$  radiation ( $\lambda = 0.7107 \text{ \AA}$ ). Crystallographic data were collected at 300(2) K. Data were corrected for Lorentz and polarisation effects and for absorption by SADABS.<sup>2</sup> The structural resolution procedure was made using the WinGX package.<sup>3</sup> Solving for structure factor phases was performed by SHELXT-2014.<sup>4</sup> For the full matrix refinement SHELXL-2017/1<sup>19,5</sup> was used. The structures were checked for higher symmetry with help of the program PLATON.<sup>6</sup> H-atoms were introduced in calculated positions and refined riding on their parent atoms. A summary of refinement parameters can also be seen in Table S1. Also, in Table S2 the bond lengths, angles and torsion angles for the coordination environment to gold(III) is described. The intermolecular distance and angles for the hydrogen bonds found within structure 1 are summarized in Table S3.

**Table S1.** Crystal data and structure refinement for  $[\text{AuCl}_3(\text{N}^1\text{-hexylcytosine}, \text{N}(3))]$ .

|                                                           |                                 |            |
|-----------------------------------------------------------|---------------------------------|------------|
| Empirical formula                                         | s                               |            |
| Formula weight                                            | 498.58                          |            |
| Temperature (K)                                           | 300(2)                          |            |
| Wavelength ( $\text{\AA}$ )                               | 0.71073                         |            |
| Crystal system                                            | Monoclinic                      |            |
| Space group                                               | P 21/c                          |            |
| Unit cell dimensions                                      | a ( $\text{\AA}$ )              | 7.0041(19) |
|                                                           | b ( $\text{\AA}$ )              | 15.654(4)  |
|                                                           | c ( $\text{\AA}$ )              | 16.326(4)  |
|                                                           | $\beta$ ( $^\circ$ )            | 115.405(8) |
| Volume ( $\text{\AA}^3$ )                                 | 1617.0(7)                       |            |
| Z                                                         | 4                               |            |
| Density (calculated) ( $\text{Mg/m}^3$ )                  | 2.048                           |            |
| Absorption coefficient ( $\text{mm}^{-1}$ )               | 9.586                           |            |
| F(000)                                                    | 944                             |            |
| Crystal size ( $\text{mm}^3$ )                            | 0.200 x 0.070 x 0.070           |            |
| Theta range for data collection ( $^\circ$ )              | 1.897 to 28.508                 |            |
| Index ranges                                              | -9 $\leq$ h $\leq$ 9            |            |
|                                                           | 0 $\leq$ k $\leq$ 20            |            |
|                                                           | -21 $\leq$ l $\leq$ 21          |            |
| Reflections collected                                     | 7301                            |            |
| Independent reflections                                   | 3861 [R(int) = 0.0687]          |            |
| Completeness to theta = 25.242 $^\circ$ (%)               | 100.0                           |            |
| Absorption correction                                     | Semi-empirical from equivalents |            |
| Max. and min. transmission                                | 1 and 0.628                     |            |
| Refinement method                                         | Full-matrix least-squares on F2 |            |
| Data / restraints / parameters                            | 3861 / 46 / 164                 |            |
| Goodness-of-fit on F2                                     | 0.880                           |            |
| Final R indices [ $I > 2\sigma(I)$ ]                      | R1                              | 0.0516     |
|                                                           | wR2                             | 0.0975     |
| R indices (all data)                                      | R1                              | 0.1145     |
|                                                           | wR2                             | 0.1136     |
| Largest diff. peak and hole ( $e \cdot \text{\AA}^{-3}$ ) | 0.969 and -1.958                |            |

**Table S2.** Coordination environment bond lengths and angles for **[AuCl<sub>3</sub>(N<sup>1</sup>-hexylcytosine,N(3))]**.

| distances (Å) |          | angles (°)        |            | torsions (°)          |           |
|---------------|----------|-------------------|------------|-----------------------|-----------|
| Au(1)-N(3)    | 2.021(8) | N(3)-Au(1)-Cl(2)  | 176.1(2)   | Cl(1)-Au(1)-N(3)-C(2) | 76.4(8)   |
| Au(1)-Cl(2)   | 2.256(3) | N(3)-Au(1)-Cl(3)  | 88.6(2)    | Cl(1)-Au(1)-N(3)-C(4) | -106.6(8) |
| Au(1)-Cl(3)   | 2.257(3) | Cl(2)-Au(1)-Cl(3) | 91.09(12)  | Cl(2)-Au(1)-N(3)-C(2) | -19(4)    |
| Au(1)-Cl(1)   | 2.287(3) | N(3)-Au(1)-Cl(1)  | 90.0(2)    | Cl(2)-Au(1)-N(3)-C(4) | 159(3)    |
|               |          | Cl(2)-Au(1)-Cl(1) | 90.39(11)  | Cl(3)-Au(1)-N(3)-C(2) | -104.5(7) |
|               |          | Cl(3)-Au(1)-Cl(1) | 178.34(10) | Cl(3)-Au(1)-N(3)-C(4) | 72.6(8)   |

**Table S3.** Distances and angles for the hydrogen bond interactions in **[AuCl<sub>3</sub>(N<sup>1</sup>-hexylcytosine,N(3))]**.

| D-H···A              | d(D-H) (Å) | d(H···A) (Å) | d(D···A) (Å) | <(DHA) (°) |
|----------------------|------------|--------------|--------------|------------|
| N(4)-H(4A)···Cl(1)#1 | 0.86       | 2.66         | 3.451(10)    | 153.2      |
| N(4)-H(4B)···Cl(1)#2 | 0.86       | 2.71         | 3.472(8)     | 149.0      |
| C(5)-H(5)···O(2)#2   | 0.93       | 2.33         | 3.166(11)    | 148.7      |
| C(6)-H(6)···Cl(2)#3  | 0.93       | 2.95         | 3.790(13)    | 150.8      |
| C(7)-H(7B)···Cl(3)#4 | 0.97       | 2.89         | 3.684(11)    | 139.4      |
| C(7)-H(7A)···Cl(2)#3 | 0.97       | 2.88         | 3.797(12)    | 158.4      |

Symmetry transformations used to generate equivalent atoms:

#1: -x+1,-y+1,-z+1; #2: x-1,y,z; #3: x,-y+3/2,z+1/2; #4: x+1,-y+3/2,z+1/2

## Theoretical methods

The energies of the complexes included in this study were computed at the PBE1PBE -D3/def2-TZVP level of theory by using the program Gaussian-16.<sup>7</sup> The interaction energy (or binding energy in this work)  $\Delta E$ , is defined as the energy difference between the dimer complex and the sum of the energies of the monomers. For the calculations we have used the Weigend def2-TZVP<sup>8,9</sup> basis set and the PBE1PBE DFT functional.<sup>10</sup> The MEP (Molecular Electrostatic Potential) surfaces calculations have been computed using Gaussian-16 software at the PBE1PBE-D3/def2-TZVP level of theory. The AIM formalism elucidated bond paths via analysis of the topology of the electron density,<sup>11,12</sup> using the PBE1PBE-D3/def2-TZVP wavefunction and making use of the AIMALL program.<sup>13</sup>

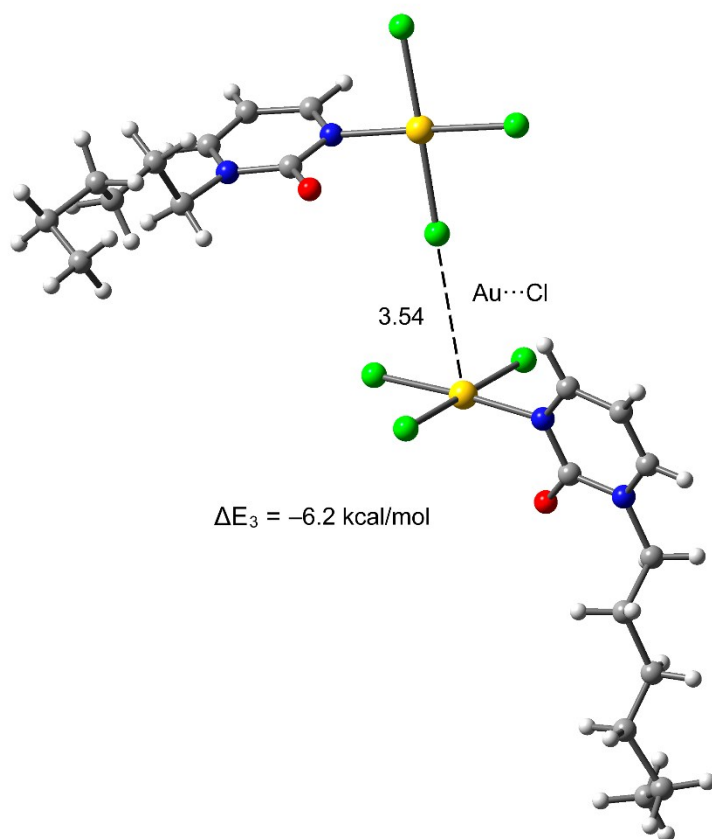

**Figure S2.** Structure (PBE0-D3/def2-TZVP) of an alternative arrangement of a dimeric structure of **1** (without the amine, see also Figure 4, right) held together with only one regium bonding interaction; one complex was forced to rotate 90° around one intermolecular Cl···Au bond to give a single Au–Cl···Au angle near 180° (geometry optimization led to the original dimer). The interaction energy ( $\Delta E_3$ ) of –6.2 kcal/mol is less than half the stabilization energy of a dimer with two Cl···Au interactions ( $\Delta E_2 = -15.9$ ; Figure 4, right). This might be due to the diminished electron density at the extension of the Au–Cl bonds, as can also be seen in Figure 3. Alternatively, or concomitantly, the extra stabilization energy of  $\Delta E_2$  might be due to a synergistic effect because both monomers can act as an electron donor with a Cl-atom as well as an electron acceptor with their Au atoms.

## CSD search

The Cambridge Structure Database (CSD) version 5.41 with updates until November 2019 was inspected using ConQuest version 2.0.4 (build 270014). All queries were limited to single crystal structures that contained 3D coordinates and had an R-factor of  $\leq 0.1$ .

It appeared that the CSD contains 4,445 CIFs with an  $\text{AuX}_4$  structure where X can be any atom and the Au–X bonds were set as ‘any bond’. These CIFs were further inspected for instances where any electron rich atom (EIR = N, P, As, O, S, Se, Te, F, Cl, Br, I, At) has a maximum *intermolecular* Au $\cdots$ EIR distance ( $d$ ) of  $2 \text{ \AA} +$  the Bondi van der Waals radii of Au (1.66  $\text{\AA}$ ) and EIR (see also the inset figure on the left-hand side of Figure 6). The four X–Au $\cdots$ EIR angles ( $\alpha$ ) were measured as well and the shortest was used in the analysis. This query resulted in 24,868 distance-angle pairs contained within 2,781 CIFs, which were binned and plotted as the heat plot shown in the left-hand side of Figure 6 (using Origin 2018). A plot of a similar dataset limited to EIR = any halogen atom is shown in Figure S4 (13,139 [ $d'$ ;  $\alpha$ ] pairs within 1,654 CIFs).

A plot of a similar dataset limited to  $[\text{AuHlg}_3\text{N}]$  complexes is shown in the left-hand side of Figure S5 (508 [ $d'$ ;  $\alpha$ ] pairs within 86 CIFs). 93% of these data (i.e. 472 [ $d'$ ;  $\alpha$ ] pairs in 77 CIFs) involve a  $[\text{AuCl}_3\text{N}]$  complex and the accompanying heat plot is shown in the right-hand side of Figure S5. All the 77 CIFs used for Figure S5 (right) are listed in Table S4, together with the electron rich atom (EIR), the van der Waals corrected Au $\cdots$ EIR distance ( $d'$ ) according to Bondi and Batsanov, and the smallest N/Cl–Au $\cdots$ EIR angle ( $\alpha$ ) that are associated with the shortest intermolecular Au $\cdots$ EIR distance measured for each CIF. In this table, the data characterized by van der Waals overlap has been highlighted in green, which is 14% using Bondi’s van der Waals radius of Au (1.66  $\text{\AA}$ ) and 43% using Batsanov’s van der Waals radius of Au (1.86  $\text{\AA}$ ).

A similar search revealed that the CSD contains a total of 1,556 CIFs with an  $\text{X}_3\text{AuHlg}$  complex where Hlg can be any halogen atom. Within these structures, 523 CIFs were identified where two  $\text{X}_3\text{AuHlg}$  complexes are characterized by two  $d' \leq 2 \text{ \AA}$  intermolecular (Bondi) van der Waals corrected Au $\cdots$ Hlg distances (see also the inset figure on the right-hand side of Figure 6). Both Au–Hlg $\cdots$ Au angles ( $\beta$ ) were measured as well, which resulted in 1,636 distance-angle [ $d'$ ;  $\beta$ ] pairs within 818 CIFs. The pairs with the shortest  $d'$  (and accompanying  $\beta$ ) were used to generate the heat plot shown on the right-hand side of Figure 6 (i.e., using 818 [ $d'$ ;  $\beta$ ] pairs). Plotting all 1,636 [ $d'$ ;  $\beta$ ] pairs gave a nearly identical heat plot, as is shown in Figure S6.

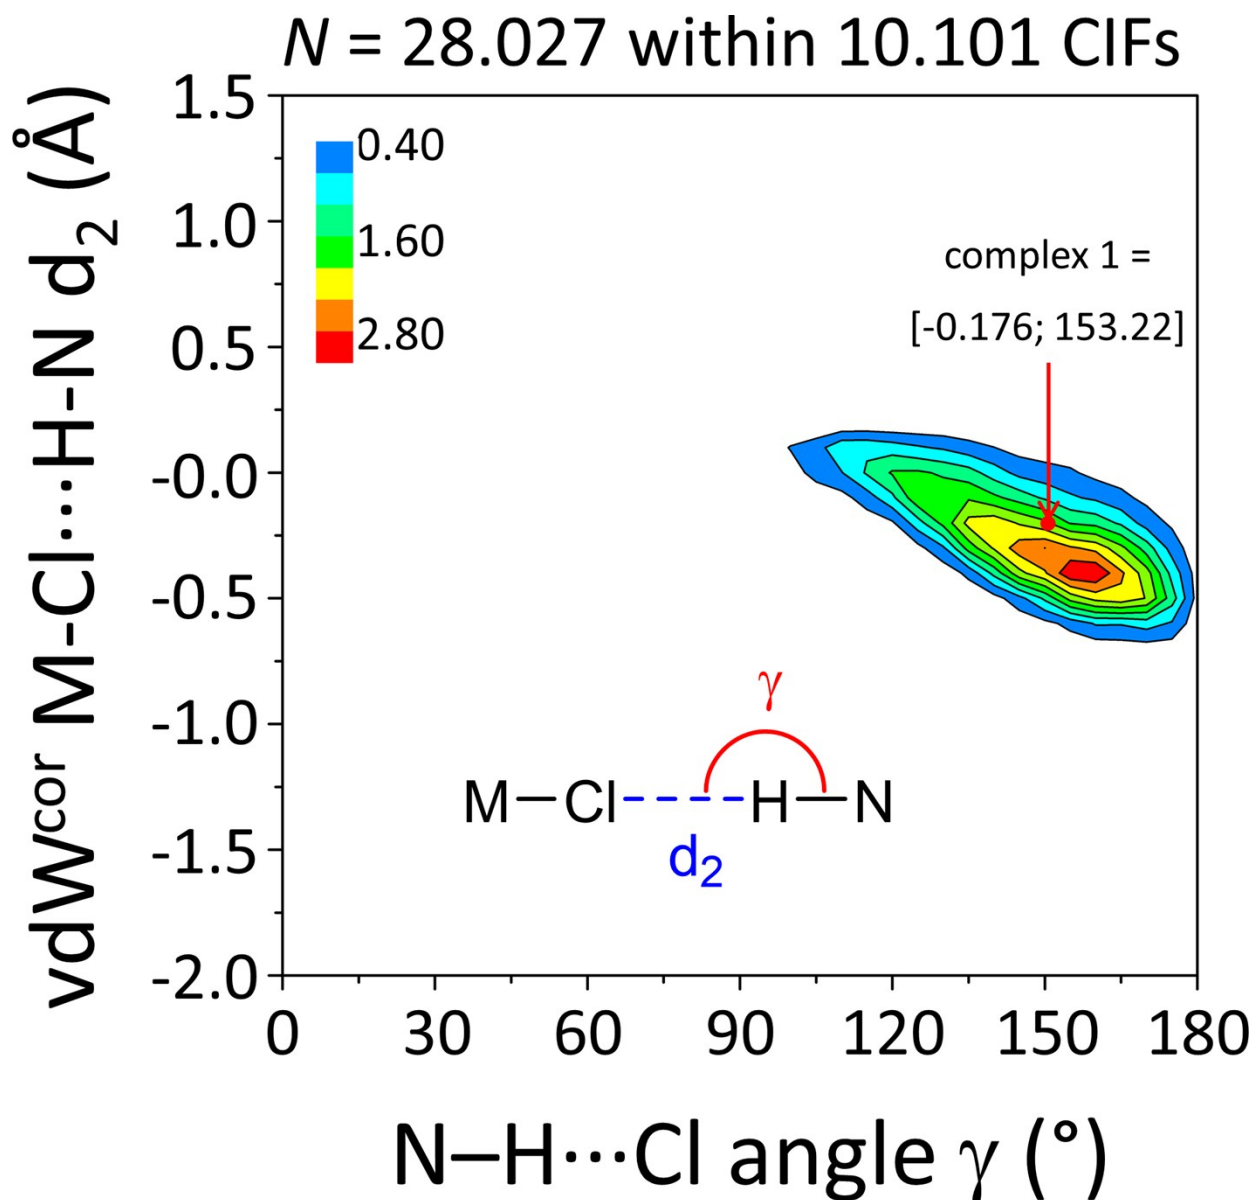

**Figure S3.** Heat plots of van der Waals corrected intermolecular M-Cl $\cdots$ H-N distances ( $d_2$ , derived from  $d$  and the Bondi van der Waals radii of Cl (1.75) and H (1.09)) as a function of N-H $\cdots$ Cl angle  $\gamma$  (see inset Figure). M can be any metal and the M-Cl bond was set to any bond. The 28.027 unique data points ( $N$ ) are data are contained within 10.101 CIFs (searching only structures with 3D coordinates, an R-factor of 0.1 or below and excluding powder XRD structures). The geometric information of complex 1 is indicated in the figure and can be seen as moderate (in between the clear peak at [-0.5; 160] and the tail around [0; 120]).



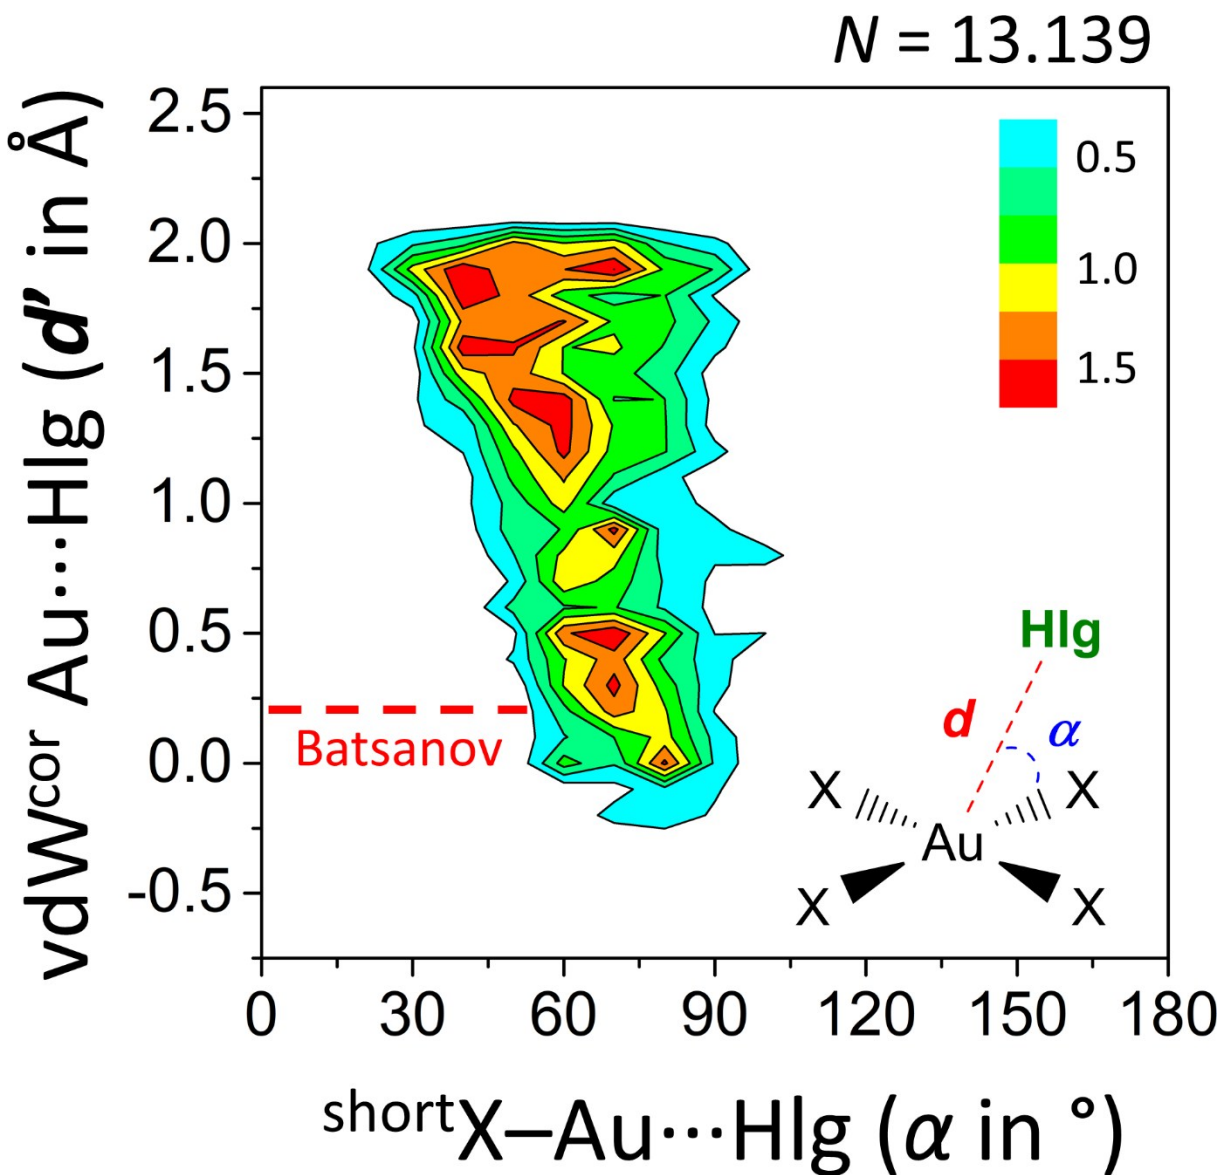

**Figure S4.** Heat plots of van der Waals corrected intermolecular Au...Y distances ( $d'$ , derived from  $d$  and the Bondi van der Waals radii of Au and Hlg) as a function of angle  $\alpha$  (see inset Fig., the shortest angle was used). The plot involves 13.139 hits contained within 1.654 CIFs. Hlg = any halogen atom, X = any atom, and data involves Au...Y distances  $d' \leq 2 \text{ Å}$ ). The red dashed line represents van der Waals overlap using Batsanov's van der Waals radius for Au (1.86 Å). See Figure 6 (left) for the plot of a similar dataset involving any electron rich atom instead of only halogens (EIR = N, P, As, O, S, Se, Te, F, Cl, Br, I, At).

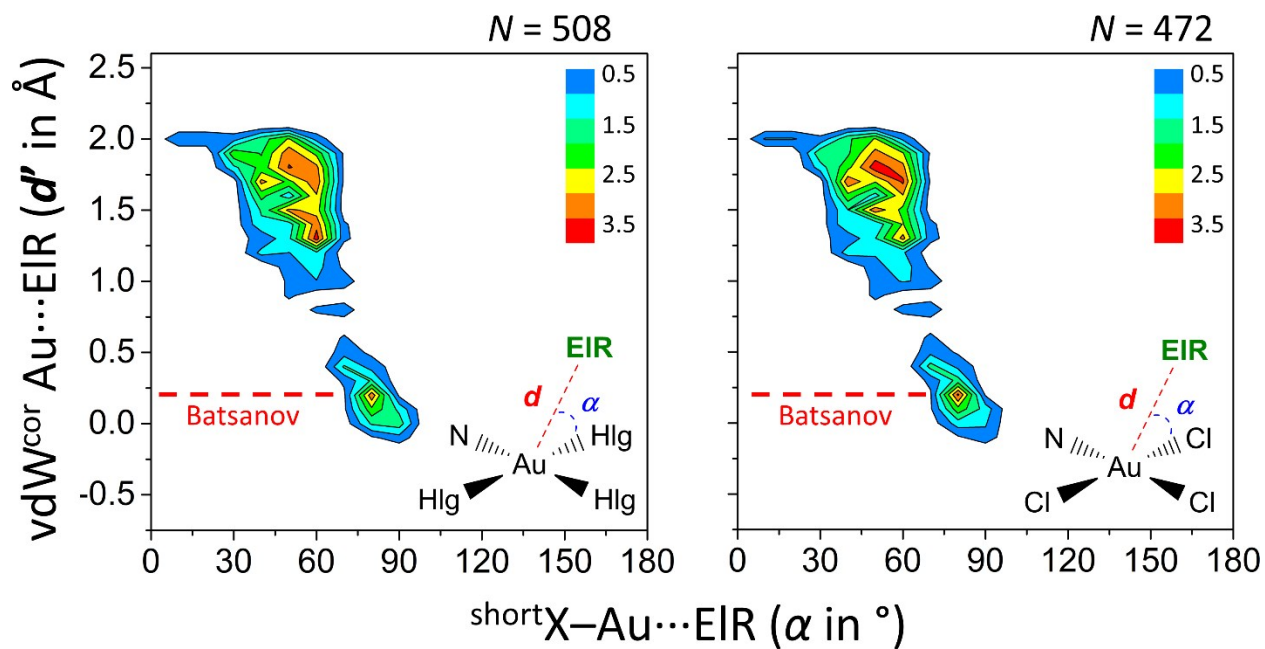

**Figure S5.** Heat plots of van der Waals corrected intermolecular Au...EIR distances ( $d'$ , derived from  $d$  and the Bondi van der Waals radii of Au and Hlg) as a function of angle  $\alpha$  (see inset Fig.s, the shortest angle was used). Left: 508 hits contained within 86 CIFs involving [AuHlg<sub>3</sub>N] complexes. Right: 4728 hits contained within 77 CIFs involving [AuCl<sub>3</sub>N] complexes. EIR = N, P, As, O, S, Se, Te, F, Cl, Br, I, At; Hlg = any halogen atom; data involves Au...EIRY distances  $d' \leq 2$  Å. The red dashed line represents van der Waals overlap using Batsanov's van der Waals radius for Au (1.86 Å).

**Table S4.** Overview the 77 CIFs used for Figure S3 (right) together with relevant (geometric) data of the shortest intermolecular Au...EIR distance found for each CIF. Data characterized by van der Waals overlap has been highlighted in green.

| CIF:     | EIR | <i>d'</i> (shortest) in Å |          |              | CIF:     | EIR | <i>d'</i> (shortest) in Å |          |              |
|----------|-----|---------------------------|----------|--------------|----------|-----|---------------------------|----------|--------------|
|          |     | Bondi                     | Batsanov | $\alpha$ (°) |          |     | Bondi                     | Batsanov | $\alpha$ (°) |
| WIRGAH   | CI  | -0.124                    | -0.324   | 85.9         | BUVVIY   | CI  | 0.248                     | 0.048    | 84.6         |
| RIMFIF   | CI  | -0.097                    | -0.297   | 75.8         | YIDMAA   | CI  | 0.249                     | 0.049    | 85.0         |
| SEVXID   | CI  | -0.073                    | -0.273   | 80.9         | ELUVAK   | CI  | 0.263                     | 0.063    | 80.2         |
| NOKMUX   | CI  | -0.057                    | -0.257   | 87.8         | VOYNUU   | CI  | 0.263                     | 0.063    | 83.4         |
| ZUHNIB   | CI  | -0.054                    | -0.254   | 85.1         | XIMWOI   | CI  | 0.281                     | 0.081    | 79.7         |
| VANPUY   | CI  | -0.052                    | -0.252   | 85.4         | KUFNAB   | CI  | 0.286                     | 0.086    | 71.8         |
| NOKMOR   | CI  | -0.047                    | -0.247   | 86.7         | SASRIQ   | CI  | 0.308                     | 0.108    | 76.6         |
| FEYTEI   | CI  | -0.017                    | -0.217   | 80.7         | EHEXOG   | CI  | 0.349                     | 0.149    | 78.4         |
| HAFFIE   | CI  | -0.010                    | -0.210   | 73.2         | MIYZAY   | CI  | 0.376                     | 0.176    | 79.7         |
| SASREM   | CI  | -0.003                    | -0.203   | 87.4         | HOSHII   | CI  | 0.377                     | 0.177    | 85.5         |
| BUWVUM   | CI  | -0.002                    | -0.202   | 84.1         | KOXQEV   | CI  | 0.406                     | 0.206    | 73.8         |
| SASREM01 | CI  | 0.005                     | -0.195   | 87.3         | DEDYUG   | CI  | 0.436                     | 0.236    | 80.4         |
| KILFIV   | CI  | 0.015                     | -0.185   | 85.7         | QIHVOS   | CI  | 0.445                     | 0.245    | 72.2         |
| HOSHUU   | CI  | 0.032                     | -0.168   | 84.5         | DIWYIU   | CI  | 0.460                     | 0.260    | 69.9         |
| SOVROM   | CI  | 0.042                     | -0.158   | 80.7         | HAFFEA   | CI  | 0.474                     | 0.274    | 84.6         |
| NOKNAE   | CI  | 0.050                     | -0.150   | 86.4         | TIGMIH   | S   | 0.499                     | 0.299    | 65.9         |
| EHEXIA   | CI  | 0.060                     | -0.140   | 85.6         | BUVVAQ   | CI  | 0.609                     | 0.409    | 85.2         |
| ZUHN0H   | CI  | 0.064                     | -0.136   | 75.2         | KOXQAR   | CI  | 0.798                     | 0.598    | 65.9         |
| BIRCUA   | CI  | 0.069                     | -0.131   | 79.4         | SUYXER   | N   | 0.914                     | 0.714    | 62.0         |
| AVATUN   | CI  | 0.070                     | -0.130   | 76.3         | MUPHIP   | N   | 0.951                     | 0.751    | 58.2         |
| GOXCAX   | CI  | 0.090                     | -0.110   | 86.7         | BIXBOZ10 | N   | 0.982                     | 0.782    | 59.7         |
| ZUHNAT   | CI  | 0.102                     | -0.098   | 74.7         | TIRMEP   | CI  | 1.124                     | 0.924    | 75.9         |
| MOCFER   | CI  | 0.109                     | -0.091   | 82.4         | CDMPAU01 | CI  | 1.221                     | 1.021    | 40.5         |
| WONZUX   | CI  | 0.114                     | -0.086   | 86.2         | DODXID   | CI  | 1.251                     | 1.051    | 30.4         |
| MOCFUH   | CI  | 0.118                     | -0.082   | 81.0         | CDMPAU   | CI  | 1.318                     | 1.118    | 39.5         |
| FEDTUF   | CI  | 0.129                     | -0.071   | 82.9         | SUYXIV   | CI  | 1.326                     | 1.126    | 81.2         |
| UQIBEC   | CI  | 0.142                     | -0.058   | 87.8         | CPYQAU   | CI  | 1.345                     | 1.145    | 59.2         |
| MAJDAC   | CI  | 0.153                     | -0.047   | 83.4         | DIWXAL   | CI  | 1.350                     | 1.150    | 41.3         |
| DOYPOY   | CI  | 0.172                     | -0.028   | 80.7         | DIWWUE   | CI  | 1.455                     | 1.255    | 39.3         |
| GOXCUR   | CI  | 0.184                     | -0.016   | 80.3         | NIYTIA   | CI  | 1.662                     | 1.462    | 47.5         |
| VEGMEZ   | CI  | 0.185                     | -0.015   | 65.8         | OJELIA   | N   | 1.672                     | 1.472    | 57.6         |
| MIYYOL   | CI  | 0.193                     | -0.007   | 87.5         | AUBQNL01 | CI  | 1.711                     | 1.511    | 38.6         |
| RADLAJ   | CI  | 0.200                     | 0.000    | 76.3         | VUFXIE   | CI  | 1.770                     | 1.570    | 50.8         |
| QAWDEA   | CI  | 0.220                     | 0.020    | 76.8         | ZUHNUN   | CI  | 1.903                     | 1.703    | 42.2         |
| VOYPAC   | CI  | 0.220                     | 0.020    | 85.2         | HORVIV   | N   | 1.953                     | 1.753    | 22.5         |
| PYAUCL10 | CI  | 0.226                     | 0.026    | 79.5         | LUVRIF   | CI  | 1.955                     | 1.755    | 47.3         |
| MIYZEC   | CI  | 0.230                     | 0.030    | 82.4         | AZTLAW   | N   | 1.957                     | 1.757    | 40.6         |
| SUYXAN   | CI  | 0.230                     | 0.030    | 68.6         | LAYPUY   | CI  | 1.969                     | 1.769    | 61.2         |
| HIHCIK   | CI  | 0.246                     | 0.046    | 82.3         |          |     |                           |          |              |

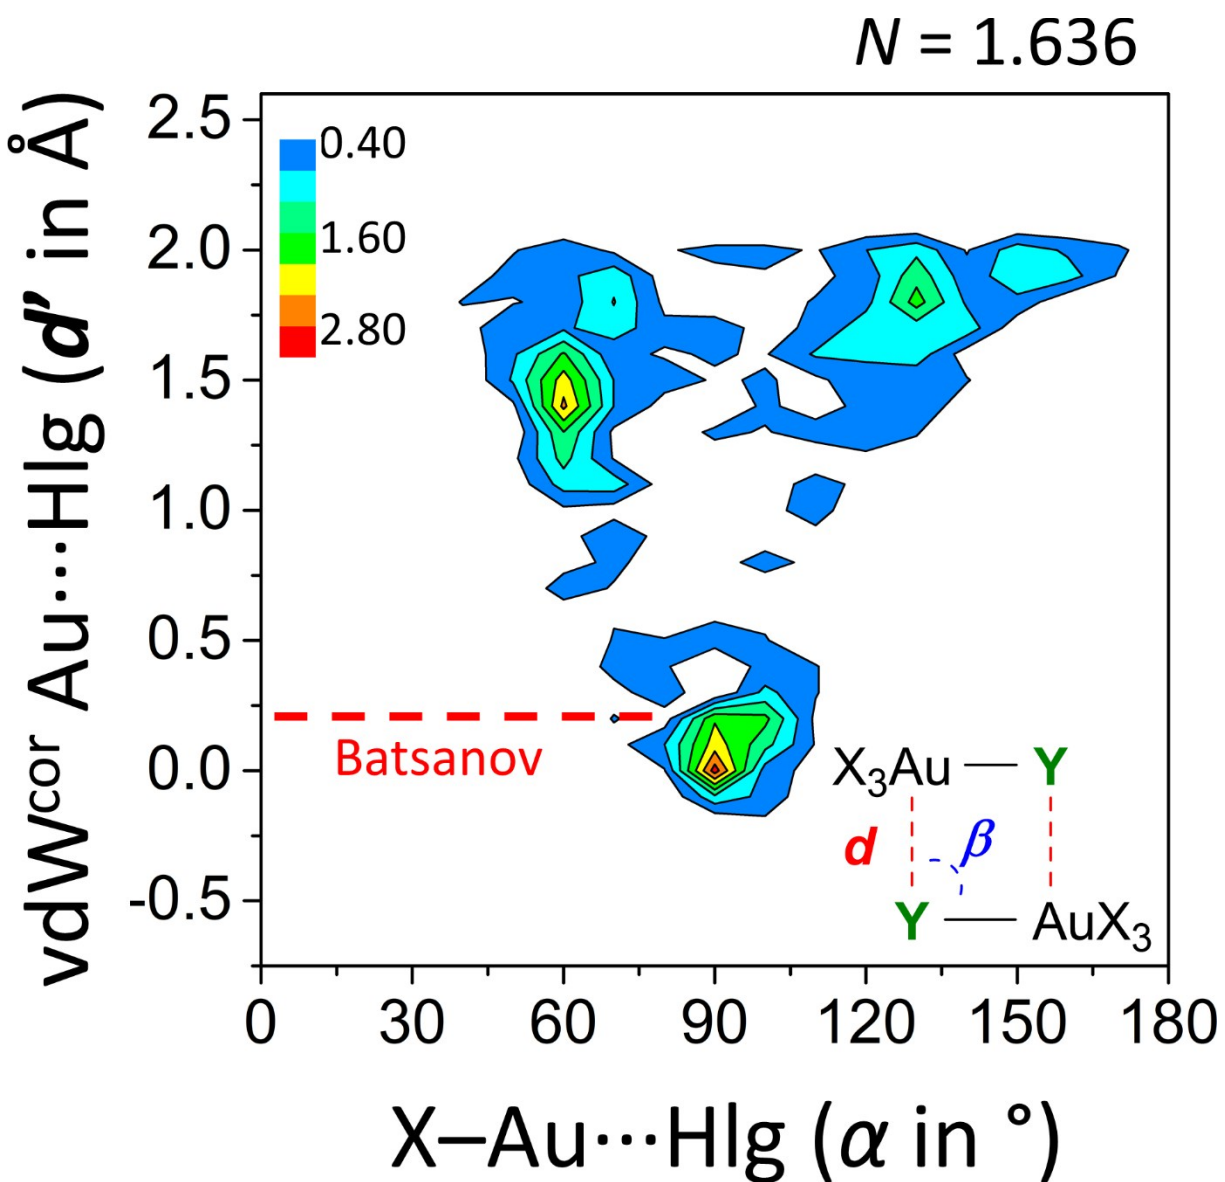

**Figure S6.** Heat plots of van der Waals corrected intermolecular Au $\cdots$ Hlg distances ( $d'$ , derived from  $d$  and the Bondi van der Waals radii of Au and Hlg) as a function of X–Au $\cdots$ Hlg angle  $\beta$ . Both distance-angle pairs (1.636 within 532 CIFs) of the dimer (see inset Fig.) were used to generate this plot, as opposed to only the shortest distance (and related angle) used in Fig. 6. Hlg = any halogen (F, Cl, Br, I, At), X can be any atom and the queries (illustrated in the inset Figures) involved data with Au $\cdots$ Y distances  $d$  of  $\leq$  the Bondi van der Waals radii of Au and Hlg + 2 Å. The red dashed line represents van der Waals overlap using Batsanov's van der Waals radius for Au (1.86 Å).

## References:

---

- <sup>1</sup> M. Barceló-Oliver, B. A. Baquero, A. Bauzá, A. García-Raso, A. Terrón, I. Mata, E. Molins, A. Frontera, *CrysEngComm* **2012**, *14*, 5777–5784.
- <sup>2</sup> SADABS, Bruker-AXS, Version 1, Bruker AXS Inc., Madison, WI, **2004**.
- <sup>3</sup> L.J. Farrugia, WinGX suite for small-molecule single-crystal crystallography. *J. Appl. Crystallogr.* **1999**, *32*, 837–838.
- <sup>4</sup> G.M. Sheldrick, Crystal structure refinement with SHELXL. *Acta Crystallogr.* **2015**, *C71*, 3–8.
- <sup>5</sup> G.M. Sheldrick, SHELXL-2017/1, Program for the Solution of Crystal Structures, University of Göttingen, Germany, **2017**.
- <sup>6</sup> A.L. Spek, *Acta Crystallogr.* **2009**, *D65*, 148–155.
- <sup>7</sup> Gaussian 16, Revision C.01, M. J. Frisch, G. W. Trucks, H. B. Schlegel, G. E. Scuseria, M. A. Robb, J. R. Cheeseman, G. Scalmani, V. Barone, G. A. Petersson, H. Nakatsuji, X. Li, M. Caricato, A. V. Marenich, J. Bloino, B. G. Janesko, R. Gomperts, B. Mennucci, H. P. Hratchian, J. V. Ortiz, A. F. Izmaylov, J. L. Sonnenberg, D. Williams-Young, F. Ding, F. Lipparini, F. Egidi, J. Goings, B. Peng, A. Petrone, T. Henderson, D. Ranasinghe, V. G. Zakrzewski, J. Gao, N. Rega, G. Zheng, W. Liang, M. Hada, M. Ehara, K. Toyota, R. Fukuda, J. Hasegawa, M. Ishida, T. Nakajima, Y. Honda, O. Kitao, H. Nakai, T. Vreven, K. Throssell, J. A. Montgomery, Jr., J. E. Peralta, F. Ogliaro, M. J. Bearpark, J. J. Heyd, E. N. Brothers, K. N. Kudin, V. N. Staroverov, T. A. Keith, R. Kobayashi, J. Normand, K. Raghavachari, A. P. Rendell, J. C. Burant, S. S. Iyengar, J. Tomasi, M. Cossi, J. M. Millam, M. Klene, C. Adamo, R. Cammi, J. W. Ochterski, R. L. Martin, K. Morokuma, O. Farkas, J. B. Foresman, and D. J. Fox, Gaussian, Inc., Wallingford CT, 2016.
- <sup>8</sup> F. Weigend, *Phys. Chem. Chem. Phys.* **2006**, *8*, 1057–1065.
- <sup>9</sup> F. Weigend, R. Ahlrichs, *Phys. Chem. Chem. Phys.* **2005**, *7*, 3297–3305.
- <sup>10</sup> C. Adamo, V. Barone, *J. Chem. Phys.*, **1999**, *110*, 6158-6169.
- <sup>11</sup> R. F. W. Bader, M. T. Carroll, J. R. Cheeseman, C. Chang, *J. Am. Chem. Soc.* **1987**, *109*, 7968–7979.
- <sup>12</sup> R. F. W. Bader, *Atoms in Molecules, A Quantum Theory*, Clarendon, Oxford, **1990**.
- <sup>13</sup> AIMAll (Version 17.11.14), T. A. Keith, TK Gristmill Software, Overland Park KS, USA, ([aim.tkgristmill.com](http://aim.tkgristmill.com)), 2013
